# Supplementary material for: Therapeutic Potential of Exosomes in Tendon and Tendon–Bone Healing: A Systematic Review of Preclinical Studies
Source: MDPI journal article supplement (doi:10.3390/jfb14060299), 2023-05-28
Supplement: s1 [file s1]

**Table S2:** Specific search Strategy

|    |                                                              |
|----|--------------------------------------------------------------|
| 1  | Exosome* (Title OR Abstract OR Key words)                    |
| 2  | Extracellular vesicle* (Title OR Abstract OR Key words)      |
| 3  | Exosomal (Title OR Abstract OR Key words)                    |
| 4  | Cell-Derived Microparticle* (Title OR Abstract OR Key words) |
| 5  | Secretome* (Title OR Abstract OR Key words)                  |
| 6  | Tendon* (Title OR Abstract OR Key words)                     |
| 7  | Ligament* (Title OR Abstract OR Key words)                   |
| 8  | Rotator cuff (Title OR Abstract OR Key words)                |
| 9  | Achilles (Title OR Abstract OR Key words)                    |
| 10 | Enthesis (Title OR Abstract OR Key words)                    |
| 11 | Footprint (Title OR Abstract OR Key words)                   |
| 12 | Tendinous* (Title OR Abstract OR Key words)                  |
| 13 | Tendinopathy (Title OR Abstract OR Key words)                |
| 14 | Tendinopathies (Title OR Abstract OR Key words)              |
| 15 | Tendinosis (Title OR Abstract OR Key words)                  |
| 16 | Tendinitis (Title OR Abstract OR Key words)                  |
| 17 | 1 OR 2 OR 3 OR 4 OR 5                                        |
| 18 | 6 OR 7 OR 8 OR 9 OR 10 OR 11 OR 12 OR 13 OR 14 OR 15 OR 16   |
| 19 | 17 AND 18                                                    |

**Table S3:** Inclusion and Exclusion Criteria

|                 | Inclusion Criteria                                                         | Exclusion Criteria                                                                                                         |
|-----------------|----------------------------------------------------------------------------|----------------------------------------------------------------------------------------------------------------------------|
| Study type      | Original Article                                                           | Patent<br>Conference Abstract<br>Letter<br>Case report<br>Editorial and Editorial materials<br>Review article              |
| Language        | English                                                                    | Not English                                                                                                                |
| Topic           | Exosome and Tendon healing<br>Exosome and Tendon-bone healing              | Periodontal ligament or dental related diseases<br>Not related to tendon OR tendon-bone healing<br>Not related to Exosomes |
| Experiment type | In vivo or ex vivo experiment<br>In vivo (ex vivo) and in vitro experiment | Only with in vitro experiment                                                                                              |
| Quality         | Good quality of research studies                                           | Poor quality of research                                                                                                   |

For articles which focus on the effect of extracellular vesicles promoting tendon, tendon-bone or ligament repair, we examined the distribution of extracellular vesicle diameters. Articles in which the distribution of diameters were significantly outside the distribution of exosomes (30~150nm) were excluded.

**Table S4:** Risk of bias assessed using SYRCLE risk of bias assessment tool

| Author                         | Year | Selection bias      |                          |                        | Performance bias |              | Detection bias            |              | Attrition bias          | Reporting bias              | Other bias            |
|--------------------------------|------|---------------------|--------------------------|------------------------|------------------|--------------|---------------------------|--------------|-------------------------|-----------------------------|-----------------------|
|                                |      | Sequence generation | Baseline characteristics | Allocation concealment | Random housing   | Blinding     | Random Outcome assessment | Blinding     | Incomplete outcome data | Selective outcome reporting | Other sources of bias |
| Chamberlain et.al <sup>1</sup> | 2019 | Unclear risk        | Low risk                 | Unclear risk           | Unclear risk     | Unclear risk | Low risk                  | Unclear risk | Low risk                | Low risk                    | Low risk              |
| Chen et.al <sup>2</sup>        | 2021 | Unclear risk        | Low risk                 | Unclear risk           | Unclear risk     | Unclear risk | Low risk                  | Unclear risk | Low risk                | Low risk                    | Low risk              |
| Cui et.al <sup>3</sup>         | 2019 | Unclear risk        | Low risk                 | Unclear risk           | Unclear risk     | Unclear risk | Low risk                  | Low risk     | Low risk                | Low risk                    | Low risk              |
| Davies et.al <sup>4</sup>      | 2022 | Unclear risk        | Low risk                 | Unclear risk           | Unclear risk     | Unclear risk | Low risk                  | Unclear risk | Low risk                | Low risk                    | Low risk              |
| Fu et.al <sup>5</sup>          | 2021 | Unclear risk        | Low risk                 | Unclear risk           | Unclear risk     | Unclear risk | Low risk                  | Unclear risk | Low risk                | Low risk                    | Low risk              |
| Gao et.al <sup>6</sup>         | 2022 | Unclear risk        | Low risk                 | Unclear risk           | Unclear risk     | Unclear risk | Low risk                  | Unclear risk | Low risk                | Low risk                    | Low risk              |
| Gissi et.al <sup>7</sup>       | 2020 | Unclear risk        | Low risk                 | Unclear risk           | Low risk         | Unclear risk | Low risk                  | Low risk     | Low risk                | Low risk                    | Low risk              |
| Han et.al <sup>8</sup>         | 2022 | Unclear risk        | Low risk                 | Unclear risk           | Unclear risk     | Unclear risk | Low risk                  | Low risk     | Low risk                | Low risk                    | Low risk              |
| Han et.al <sup>9</sup>         | 2022 | Unclear risk        | Low risk                 | Unclear risk           | Unclear risk     | Unclear risk | Low risk                  | Unclear risk | Low risk                | Low risk                    | Low risk              |
| Hayashi et.al <sup>10</sup>    | 2022 | Unclear risk        | Low risk                 | Unclear risk           | Low risk         | Unclear risk | Low risk                  | Low risk     | Low risk                | Low risk                    | Low risk              |
| Huang et.al <sup>11</sup>      | 2020 | Unclear risk        | Low risk                 | Unclear risk           | Unclear risk     | Unclear risk | Low risk                  | Unclear risk | Low risk                | Low risk                    | Low risk              |
| Jenner et.al <sup>12</sup>     | 2023 | Unclear risk        | Low risk                 | Unclear risk           | Unclear risk     | Unclear risk | Low risk                  | Low risk     | Low risk                | Low risk                    | Low risk              |
| Li et.al <sup>13</sup>         | 2020 | Unclear risk        | Low risk                 | Unclear risk           | Unclear risk     | Unclear risk | Low risk                  | Unclear risk | Low risk                | Low risk                    | Low risk              |
| Li et.al <sup>14</sup>         | 2022 | Unclear risk        | Low risk                 | Unclear risk           | Unclear risk     | Unclear risk | Low risk                  | Unclear risk | Low risk                | Low risk                    | Low risk              |
| Li et.al <sup>15</sup>         | 2022 | Unclear risk        | Low risk                 | Unclear risk           | Low risk         | Unclear risk | Low risk                  | Unclear risk | Low risk                | Low risk                    | Low risk              |
| Liu et.al <sup>16</sup>        | 2021 | Unclear risk        | Low risk                 | Unclear risk           | Unclear risk     | Unclear risk | Low risk                  | Unclear risk | Low risk                | Low risk                    | Low risk              |
| Liu et.al <sup>17</sup>        | 2021 | Unclear risk        | Low risk                 | Unclear risk           | Unclear risk     | Unclear risk | Low risk                  | Unclear risk | Low risk                | Low risk                    | Low risk              |
| Ren                            | 2021 | Unclear risk        | Low risk                 | Unclear risk           | Unclear risk     | Unclear risk | Low risk                  | Unclear risk | Low risk                | Low risk                    | Low risk              |

|                             |      |                  |             |                  |                 |                 |          |              |          |          |          |
|-----------------------------|------|------------------|-------------|------------------|-----------------|-----------------|----------|--------------|----------|----------|----------|
| et.al <sup>18</sup>         |      | r risk           | risk        | r risk           | risk            | risk            |          |              |          |          |          |
| Shen et.al <sup>19</sup>    | 2019 | Unclea<br>r risk | Low<br>risk | Unclea<br>r risk | Low risk        | Unclear<br>risk | Low risk | Unclear risk | Low risk | Low risk | Low risk |
| Shi et.al <sup>20</sup>     | 2020 | Unclea<br>r risk | Low<br>risk | Unclea<br>r risk | Unclear<br>risk | Unclear<br>risk | Low risk | Unclear risk | Low risk | Low risk | Low risk |
| Shi et.al <sup>21</sup>     | 2020 | Unclea<br>r risk | Low<br>risk | Unclea<br>r risk | Unclear<br>risk | Unclear<br>risk | Low risk | Unclear risk | Low risk | Low risk | Low risk |
| Song et.al <sup>22</sup>    | 2022 | Unclea<br>r risk | Low<br>risk | Unclea<br>r risk | Unclear<br>risk | Unclear<br>risk | Low risk | Unclear risk | Low risk | Low risk | Low risk |
| Tao et.al <sup>23</sup>     | 2021 | Unclea<br>r risk | Low<br>risk | Unclea<br>r risk | Low risk        | Unclear<br>risk | Low risk | Low risk     | Low risk | Low risk | Low risk |
| Wang et.al <sup>24</sup>    | 2019 | Unclea<br>r risk | Low<br>risk | Unclea<br>r risk | Unclear<br>risk | Unclear<br>risk | Low risk | Unclear risk | Low risk | Low risk | Low risk |
| Wang et.al <sup>25</sup>    | 2019 | Unclea<br>r risk | Low<br>risk | Unclea<br>r risk | Low risk        | Unclear<br>risk | Low risk | Unclear risk | Low risk | Low risk | Low risk |
| Wang et.al <sup>26</sup>    | 2022 | Unclea<br>r risk | Low<br>risk | Unclea<br>r risk | Unclear<br>risk | Unclear<br>risk | Low risk | Low risk     | Low risk | Low risk | Low risk |
| Wang et.al <sup>27</sup>    | 2021 | Unclea<br>r risk | Low<br>risk | Unclea<br>r risk | Unclear<br>risk | Unclear<br>risk | Low risk | Low risk     | Low risk | Low risk | Low risk |
| Wang et.al <sup>28</sup>    | 2021 | Unclea<br>r risk | Low<br>risk | Unclea<br>r risk | Low risk        | Unclear<br>risk | Low risk | Unclear risk | Low risk | Low risk | Low risk |
| Wang et.al <sup>29</sup>    | 2020 | Unclea<br>r risk | Low<br>risk | Unclea<br>r risk | Unclear<br>risk | Unclear<br>risk | Low risk | Low risk     | Low risk | Low risk | Low risk |
| Wellins et.al <sup>30</sup> | 2021 | Unclea<br>r risk | Low<br>risk | Unclea<br>r risk | High<br>risk    | High<br>risk    | Low risk | Unclear risk | Low risk | Low risk | Low risk |
| Wu et.al <sup>31</sup>      | 2022 | Unclea<br>r risk | Low<br>risk | Unclea<br>r risk | Unclear<br>risk | Unclear<br>risk | Low risk | Unclear risk | Low risk | Low risk | Low risk |
| Wu et.al <sup>32</sup>      | 2021 | Unclea<br>r risk | Low<br>risk | Unclea<br>r risk | Unclear<br>risk | Unclear<br>risk | Low risk | Unclear risk | Low risk | Low risk | Low risk |
| Xu et.al <sup>33</sup>      | 2022 | Unclea<br>r risk | Low<br>risk | Unclea<br>r risk | Unclear<br>risk | Unclear<br>risk | Low risk | Low risk     | Low risk | Low risk | Low risk |
| Xu et.al <sup>34</sup>      | 2023 | Unclea<br>r risk | Low<br>risk | Unclea<br>r risk | Unclear<br>risk | Unclear<br>risk | Low risk | Low risk     | Low risk | Low risk | Low risk |
| Xu et.al <sup>35</sup>      | 2022 | Unclea<br>r risk | Low<br>risk | Unclea<br>r risk | Unclear<br>risk | Unclear<br>risk | Low risk | Low risk     | Low risk | Low risk | Low risk |
| Yao et.al <sup>36</sup>     | 2020 | Unclea<br>r risk | Low<br>risk | Unclea<br>r risk | Low risk        | Unclear<br>risk | Low risk | Unclear risk | Low risk | Low risk | Low risk |
| Yao et.al <sup>37</sup>     | 2021 | Unclea<br>r risk | Low<br>risk | Unclea<br>r risk | Unclear<br>risk | Unclear<br>risk | Low risk | Unclear risk | Low risk | Low risk | Low risk |
| Ye et.al <sup>38</sup>      | 2023 | Unclea<br>r risk | Low<br>risk | Unclea<br>r risk | Low risk        | Unclear<br>risk | Low risk | Unclear risk | Low risk | Low risk | Low risk |
| Yu et.al <sup>39</sup>      | 2021 | Unclea<br>r risk | Low<br>risk | Unclea<br>r risk | Unclear<br>risk | Unclear<br>risk | Low risk | Unclear risk | Low risk | Low risk | Low risk |
| Yu et.al <sup>40</sup>      | 2020 | Unclea<br>r risk | Low<br>risk | Unclea<br>r risk | Unclear<br>risk | Unclear<br>risk | Low risk | Low risk     | Low risk | Low risk | Low risk |
| Zhang et.al <sup>41</sup>   | 2022 | Unclea<br>r risk | Low<br>risk | Unclea<br>r risk | Unclear<br>risk | Unclear<br>risk | Low risk | Low risk     | Low risk | Low risk | Low risk |

|                           |      |              |          |              |              |              |          |              |          |          |          |
|---------------------------|------|--------------|----------|--------------|--------------|--------------|----------|--------------|----------|----------|----------|
| Zhang et.al <sup>42</sup> | 2022 | Unclear risk | Low risk | Unclear risk | Unclear risk | Unclear risk | Low risk | Unclear risk | Low risk | Low risk | Low risk |
| Zhang et.al <sup>43</sup> | 2020 | Unclear risk | Low risk | Unclear risk | Unclear risk | Unclear risk | Low risk | Unclear risk | Low risk | Low risk | Low risk |
| Zhang et.al <sup>44</sup> | 2022 | Unclear risk | Low risk | Unclear risk | Unclear risk | Unclear risk | Low risk | Low risk     | Low risk | Low risk | Low risk |
| Zhao et.al <sup>45</sup>  | 2022 | Unclear risk | Low risk | Unclear risk | Unclear risk | Unclear risk | Low risk | Unclear risk | Low risk | Low risk | Low risk |
| Zhu et.al <sup>46</sup>   | 2022 | Unclear risk | Low risk | Unclear risk | Low risk     | Unclear risk | Low risk | Low risk     | Low risk | Low risk | Low risk |

**Table S5:** Summary of parameters of exosomes (Tendon healing and tendon-bone healing)

| Author                         | Year | Origin/Source          | Isolation method                                           | Storage | Characterization           | Size Distribution                      | EV/Exosome makers                                    |
|--------------------------------|------|------------------------|------------------------------------------------------------|---------|----------------------------|----------------------------------------|------------------------------------------------------|
| Chamberlain et.al <sup>1</sup> | 2019 | Human BM-MSC exosomes  | Differential centrifugation and ultracentrifugation        | NR      | NTA, FCM                   | 61 ~ 121 nm                            | CD146, CD29, CD44, CD63, CD81, CD105                 |
| Chen et.al <sup>2</sup>        | 2021 | Rabbit ASC exosomes    | Differential centrifugation                                | -80°C   | NTA, TEM, WB               | 99.4~233.4 nm                          | CD9, CD63                                            |
| Cui et.al <sup>3</sup>         | 2019 | Mouse BMDM exosomes    | Centrifugation and ultracentrifugation                     | NR      | NTA, TEM, WB               | 70~150 nm                              | CD9, CD63, TSG101, Alix                              |
| Davies et.al <sup>4</sup>      | 2022 | Mouse FAP              | Differential centrifugation and ultracentrifugation        | 4°C     | NTA                        | NR                                     | NR                                                   |
| Fu et.al <sup>5</sup>          | 2021 | Human ASC exosomes     | Differential centrifugation and ultracentrifugation        | NR      | NTA, TEM, WB               | 30 ~ 150 nm                            | CD9, HSP70, TSG101 +ve; Calnexin -ve                 |
| Gao et.al <sup>6</sup>         | 2022 | Human IP-MSC exosomes  | Differential centrifugation and ultracentrifugation        | NR      | NFA, TEM, WB               | 50 ~ 200 nm                            | CD9, CD63, TSG101 +ve; GM130 -ve                     |
| Gissi et.al <sup>7</sup>       | 2020 | Rat BM-MSC exosomes    | Differential centrifugation and ultracentrifugation        | -80°C   | AFM, CONAN, WB             | 30~200nm                               | Annexin XI, Annexin V, TSG101, CD29, TERT            |
| Han et.al <sup>8</sup>         | 2022 | HU-MSC exosomes        | Differential centrifugation and ultracentrifugation        | NR      | TEM, Nano FCM software, WB | 42~197 nm                              | CD9, TSG101, Alix +ve; Calnexin -ve                  |
| Han et.al <sup>9</sup>         | 2022 | Rabbit BM-MSC exosomes | Exosomes were extracted by Total Exosome Isolation Reagent | NR      | NTA, TEM, WB, FCM          | 100 ~ 200 nm                           | CD9, CD63, ALIX, Annexin V, TSG101 +ve; Calnexin -ve |
| Hayashi et.al <sup>10</sup>    | 2022 | Human BM-MSC exosomes  | Differential centrifugation and ultracentrifugation        | NR      | NTA, WB                    | P5 EVs: 148±7 nm<br>P12 EVs: 158±10 nm | CD63, CD81, Flotilin-1                               |
| Huang et.al <sup>11</sup>      | 2020 | Rat BM-MSC exosomes    | Differential centrifugation and                            | -80°C   | TEM, WB                    | 30 ~ 150 nm                            | CD9, CD63, CD 81                                     |

|                             |      |                              |                                                           |       |               |                                 |                                              |
|-----------------------------|------|------------------------------|-----------------------------------------------------------|-------|---------------|---------------------------------|----------------------------------------------|
|                             |      |                              | ultracentrifugation                                       |       |               |                                 |                                              |
| Jenner et.al. <sup>12</sup> | 2023 | HU-MSC<br>exosomes           | Ultracentrifugation                                       | -80°C | NTA, TEM, FCM | ~126.63 nm                      | CD9, CD29, CD63, CD81                        |
| Li et.al. <sup>14</sup>     | 2022 | Rat BM-MSC<br>exosomes       | Differential<br>centrifugation and<br>ultracentrifugation | NR    | NTA, TEM, WB  | 30 ~ 200 nm                     | CD9, HSP70, TSG101                           |
| Li et.al. <sup>15</sup>     | 2022 | Rat BM-MSC<br>exosomes       | Differential<br>centrifugation and<br>ultracentrifugation | NR    | NTA, TEM, WB  | ~ 100 nm                        | CD9, CD63, TSG101 +ve;<br>Calnexin -ve       |
| Li et.al. <sup>13</sup>     | 2020 | HU-MSC<br>exosomes           | Differential<br>centrifugation and<br>ultracentrifugation | NR    | NTA, TEM, WB  | 30 ~ 150 nm                     | CD9, CD63, TSG101, Alix<br>+ve; Calnexin -ve |
| Liu et.al. <sup>16</sup>    | 2021 | Rat ASC<br>exosomes          | Differential<br>centrifugation and<br>ultracentrifugation | NR    | NTA, TEM, WB  | ~ 109.6 nm                      | CD9, TSG101, HSP70                           |
| Liu et.al. <sup>17</sup>    | 2021 | Rat TSC                      | Differential<br>centrifugation and<br>ultracentrifugation | NR    | NTA, TEM, WB  | 100~200 nm                      | CD9, CD63, TSG101                            |
| Ren et.al. <sup>18</sup>    | 2021 | PEP                          | NA                                                        | -80°C | NTA, TEM      | 56.4~151 nm                     | NA                                           |
| Shen et.al. <sup>19</sup>   | 2019 | Mouse ASC<br>exosomes        | Differential<br>centrifugation and<br>ultracentrifugation | NR    | TEM, NTA, WB  | IEVs: 108±2 nm<br>EVs: 113±3 nm | CD9, CD63                                    |
| Shi et.al. <sup>20</sup>    | 2020 | Mouse BM-<br>MSC<br>exosomes | Differential<br>centrifugation and<br>ultracentrifugation | -80°C | NTA, TEM, WB  | ~120.3 nm                       | CD9, CD81, TSG101                            |
| Shi et.al. <sup>21</sup>    | 2020 | PEP                          | NA                                                        | NR    | NTA, TEM      | 93.70~124.65<br>nm              | NA                                           |
| Song et.al. <sup>22</sup>   | 2022 | Rat TSC<br>exosomes          | Differential<br>centrifugation and<br>ultracentrifugation | NR    | NTA, TEM, WB  | ~139 nm                         | CD9, CD63, CD81, TSG101                      |
| Tao et.al. <sup>23</sup>    | 2021 | Human TSPC<br>exosomes       | Differential<br>centrifugation and<br>ultracentrifugation | NR    | TEM, DLS, WB  | 73.59±38.15 nm                  | CD9, CD63, CD81                              |
| Wang et.al. <sup>26</sup>   | 2022 | Human ASC<br>exosomes        | Differential<br>centrifugation and<br>ultracentrifugation | NR    | NR            | NR                              | NR                                           |
| Wang et.al. <sup>27</sup>   | 2021 | Human ASC<br>exosomes        | Differential<br>centrifugation and<br>ultracentrifugation | NR    | NR            | NR                              | NR                                           |
| Wang et.al. <sup>28</sup>   | 2021 | Mouse BM-<br>MSC<br>exosomes | Differential<br>centrifugation and<br>ultracentrifugation | NR    | NTA, TEM, WB  | 100~150 nm                      | Hsp70, CD9, CD63, CD81,<br>TSG101            |
| Wang et.al. <sup>29</sup>   | 2020 | Human ASC<br>exosomes        | Differential<br>centrifugation and<br>ultracentrifugation | NR    | TEM, NTA, WB  | 50~150 nm                       | CD9, CD63, TSG101 +ve;<br>GM130 -ve          |
| Wang et.al. <sup>24</sup>   | 2019 | Human ASC<br>exosomes        | Differential<br>centrifugation and<br>ultracentrifugation | NR    | TEM, NTA, WB  | 50~150 nm                       | CD9, CD63, TSG101 +ve;<br>GM130 -ve          |

|                              |      |                        |                                                     |       |              |                                                                    |                                               |
|------------------------------|------|------------------------|-----------------------------------------------------|-------|--------------|--------------------------------------------------------------------|-----------------------------------------------|
| Wang et.al <sup>25</sup>     | 2019 | Rat TSC exosomes       | Differential centrifugation and ultracentrifugation | NR    | TEM, WB      | 40~200 nm                                                          | CD63, CD81                                    |
| Wellings et.al <sup>30</sup> | 2021 | PEP                    | NA                                                  | NR    | NR           | NR                                                                 | NA                                            |
| Wu et.al <sup>31</sup>       | 2022 | Human BM-MSC exosomes  | Differential centrifugation and ultracentrifugation | -80°C | NTA, TEM, WB | 80 ~ 160 nm                                                        | Hsp70, CD9, CD81, TSG101 +ve; Calnexin -ve    |
| Wu et.al <sup>32</sup>       | 2021 | Rat BM-MSC exosomes    | Differential centrifugation and ultracentrifugation | -80°C | NTA, TEM, WB | 50~200 nm                                                          | CD9, CD63, TSG101 +ve; Calnexin -ve           |
| Xu et.al <sup>33</sup>       | 2022 | Rat ASC                | Differential centrifugation and ultracentrifugation | -80°C | NTA, TEM, WB | Exosomes: 145.96±0.5 nm<br>Ectosomes: 227.66±4.9 nm                | CD9、CD63、TSG101、Hsp70、Alix +ve ; Calnexin -ve |
| Xu et.al <sup>34</sup>       | 2023 | Human ASC exosomes     | Differential centrifugation                         | -80°C | NTA, TEM, WB | EV <sub>N</sub> : 155.9±27.6 nm<br>EV <sub>B</sub> : 146.8±15.2 nm | CD9, CD63 +ve; Calnexin -ve                   |
| Xu et.al <sup>35</sup>       | 2022 | Rat IPFP-MSC exosomes  | Differential centrifugation and ultracentrifugation | NR    | NTA, TEM, WB | 50 ~ 150 nm                                                        | CD63, CD81, TSG101                            |
| Yao et.al <sup>36</sup>      | 2020 | HU-MSC exosomes        | Differential centrifugation and ultracentrifugation | -80°C | NTA, TEM, WB | 30 ~ 200 nm                                                        | CD9, CD63, Alix, TSG101                       |
| Yao et.al <sup>37</sup>      | 2021 | HU-MSC exosomes        | Differential centrifugation and ultracentrifugation | -80°C | NTA, TEM, WB | ~137 nm                                                            | CD9, CD63, Alix                               |
| Ye et.al <sup>38</sup>       | 2023 | Human IP-MSC exosomes  | Differential centrifugation and ultracentrifugation | -80°C | NTA, TEM, WB | Small EVs: ~100 nm<br>Large EVs: ~225 nm                           | CD9, CD63, TSG101 +ve; GM130 -ve              |
| Yu et.al <sup>39</sup>       | 2021 | Mouse BMDM exosomes    | Centrifugation and ultracentrifugation              | NR    | TEM, WB      | 70~150 nm                                                          | CD63, CD81, TSG101                            |
| Yu et.al <sup>40</sup>       | 2020 | Rat BM-MSC exosomes    | Differential centrifugation and ultracentrifugation | -80°C | NTA, TEM, WB | 50.5~151.7 nm                                                      | CD9, TSG101, Alix                             |
| Zhang et.al <sup>41</sup>    | 2022 | Rabbit BM-MSC exosomes | Differential centrifugation and ultracentrifugation | NR    | NTA, TEM, WB | 50 ~ 150 nm                                                        | CD9, CD63, TSG101, Alix                       |
| Zhang et.al <sup>42</sup>    | 2022 | Rat ASC exosomes       | Differential centrifugation and ultracentrifugation | NR    | NTA, TEM, WB | 50~150 nm                                                          | CD9, CD63, TSG101                             |
| Zhang et.al <sup>43</sup>    | 2020 | Rat TSC exosomes       | Differential centrifugation and ultracentrifugation | NR    | TEM, WB      | ~116 nm                                                            | CD9, TSG101, HSP70                            |
| Zhang et.al <sup>44</sup>    | 2022 | Rat BM-MSC             | Differential                                        | NR    | NTA, TEM, WB | 50~100 nm                                                          | CD63, CD81, TSG101                            |

|                          |      | exosomes              | centrifugation and ultracentrifugation              |       |              |            |                                   |
|--------------------------|------|-----------------------|-----------------------------------------------------|-------|--------------|------------|-----------------------------------|
| Zhao et.al <sup>45</sup> | 2022 | Rat ASC exosomes      | Differential centrifugation and ultracentrifugation | NR    | TEM, DLS, WB | 100~200 nm | CD9, CD63, TSG101                 |
| Zhu et.al <sup>46</sup>  | 2022 | Human IP-MSC exosomes | Differential centrifugation and ultracentrifugation | -80°C | NFA, TEM, WB | 60~160 nm  | CD9, TSG101, CD63 +ve ; GM130 -ve |

IP-MSC, induced pluripotent mesenchymal stem cells; NFA, Nano-flow analysis; TEM, Transmission electron microscope; WB, Western blot; BM-MSC, bone marrow mesenchymal stem cell; NR, not reported; P5 EVs, extracellular vesicles from mesenchymal stem cell at passage 5; P12 EVs, extracellular vesicles from mesenchymal stem cell at passage 12; NTA, nanoparticle tracking analysis; TSC, tendon stem cell; ASC, Adipose stem cell; IEVs, IFN  $\gamma$ -primed Extracellular vesicles; EVs, Extracellular vesicles; TSPC, tendon stem/progenitor cell; DLS, Dynamic Light Scattering; PEP, Purified Exosome Product; NA, not available; FAP, Fibroadipogenic progenitor; HU-MSC, Human umbilical cord mesenchymal stem cell; BMDMs, bone marrow-derived macrophages; AFM Atomic Force Microscopy; CONAN Colloidal Nano plasmonic assay; FCM, Flow Cytometry; EV<sub>B</sub>, bioactive glasses-elicited mesenchymal stem cell extracellular vesicle; EV<sub>N</sub>, native mesenchymal stem cell extracellular vesicle; IPFP MSC, Infrapatellar fat pad mesenchymal stem cell

**Table S6:** Summary of animal studies and treatment parameters. (Tendon healing)

| Author                         | Year | Group/treatment                | Concentration                   | Volume      | Delivery route        | Frequency         | Euthanasia  |
|--------------------------------|------|--------------------------------|---------------------------------|-------------|-----------------------|-------------------|-------------|
| Chamberlain et.al <sup>1</sup> | 2019 | (1) No treatment               | NA                              | NA          | NA                    | NA                | 1, 2 weeks  |
|                                |      | (2) MSC                        | NR                              | NR          | Local Injection       | At day 0          | 1, 2 weeks  |
|                                |      | (3) MQ                         | NR                              | NR          | Local Injection       | At day 0          | 1, 2 weeks  |
|                                |      | (4) EEM                        | NR                              | NR          | Local Injection       | At day 0          | 1, 2 weeks  |
|                                |      | (5) Exosomes                   | NR                              | NR          | Local Injection       | At day 0          | 1, 2 weeks  |
| Chen et.al <sup>2</sup>        | 2021 | (1) PBS                        | NA                              | NR          | Local Injection       | At day 0          | 4 weeks     |
|                                |      | (2) Exosomes                   | NR                              | NR          | Local Injection       | At day 0          | 4 weeks     |
| Cui et.al <sup>3</sup>         | 2019 | (1) BDMD exosomes              | NR                              | 20 mg       | Intravenous injection | Once every 3 days | 3 weeks     |
|                                |      | (2) Empty liposomes            | NA                              | 20 mg       | Intravenous injection | Once every 3 days | 3 weeks     |
| Davies et.al <sup>4</sup>      | 2022 | (1) PBS                        | NA                              | NR          | Local Injection       | At day 0          | 6 weeks     |
|                                |      | (2) Exosomes from UCP1++ cells | 2× 10 <sup>9</sup> particles    | NR          | Local Injection       | At day 0          | 6 weeks     |
|                                |      | (3) Exosomes from UCP1- cells  | 2× 10 <sup>9</sup> particles    |             | Local Injection       | At day 0          | 6 weeks     |
| Fu et.al <sup>5</sup>          | 2021 | (1) PBS                        | NA                              | 100 $\mu$ L | Local Injection       | At week 4         | 8, 12 weeks |
|                                |      | (2) Hydrogel                   | NA                              | 100 $\mu$ L | Local Injection       | At week 4         | 8, 12 weeks |
|                                |      | (3) Exosomes with hydrogel     | 0.3 mg/mL                       | 100 $\mu$ L | Local Injection       | At week 4         | 8, 12 weeks |
|                                |      | (4) No treatment               | NA                              | NA          | NA                    | NA                | 8, 12 weeks |
| Gao et.al <sup>6</sup>         | 2022 | (1) Sham group                 | NA                              | NA          | NA                    | NA                | 5 weeks     |
|                                |      | (2) PBS                        | NA                              | NR          | Local Injection       | At week 1         | 5 weeks     |
|                                |      | (3) Exosomes                   | 1× 10 <sup>9</sup> particles/ml | NR          | Local Injection       | At week 1         | 5 weeks     |

|                             |      |                                                               |                                                                             |        |                                                  |                    |               |
|-----------------------------|------|---------------------------------------------------------------|-----------------------------------------------------------------------------|--------|--------------------------------------------------|--------------------|---------------|
| Gissi et.al <sup>7</sup>    | 2020 | (1) PBS                                                       | NA<br>4× 10 <sup>6</sup>                                                    | 50 µL  | Local Injection                                  | At day 0           | 30 days       |
|                             |      | (2) Rat BM-MSC with PBS                                       | particles/50 µL<br>2.8× 10 <sup>12</sup>                                    | 50 µL  | Local Injection                                  | At day 0           | 30 days       |
|                             |      | (3) EV <sub>L</sub> with PBS                                  | particles/mL<br>8.4× 10 <sup>12</sup>                                       | 50 µL  | Local Injection                                  | At day 0           | 30 days       |
|                             |      | (4) EV <sub>H</sub> with PBS                                  | particles/mL                                                                | 50 µL  | Local Injection                                  | At day 0           | 30 days       |
| Han et.al <sup>8</sup>      | 2022 | (1) No treatment                                              | NA                                                                          | NA     | NA                                               | NA                 | 1 week        |
|                             |      | (2) Sham group                                                | NA                                                                          | NA     | NA                                               | NA                 | 1 week        |
|                             |      | (3) Exosomes                                                  | 100 µg/50 µL                                                                | 50 µL  | Subcutaneous injection                           | At day 0           | 1 week        |
| Hayashi et.al <sup>10</sup> | 2022 | (1) P5 EVs with PBS                                           | 3595±480 ng/20 µL                                                           | 20 µL  | Local Injection                                  | At day 1 and day 7 | 1, 4 weeks    |
|                             |      | (2) P12 EVs with PBS                                          | 3655±626 ng/20 µL                                                           | 20 µL  | Local Injection                                  | At day 1 and day 7 | 1, 4 weeks    |
|                             |      | (3) PBS                                                       | NA                                                                          | 20 µL  | Local Injection                                  | At day 1 and day 7 | 1, 4 weeks    |
| Jenner et.al <sup>12</sup>  | 2023 | (1) Ringer lactate solution and collagen sponge               | NA<br>2× 10 <sup>10</sup>                                                   | 100 µL | Implantation                                     | At day 0           | 6 weeks       |
|                             |      | (2) Exosomes with ringer lactate solution and collagen sponge | particles in 100 µL                                                         | 100 µL | Implantation                                     | At day 0           | 6 weeks       |
| Li et.al <sup>14</sup>      | 2022 | (1) Fibrin sealant                                            | NA                                                                          | 30 µL  | Local Injection                                  | At day 0           | 1, 2, 8 weeks |
|                             |      | (2) TSCs with fibrin sealant                                  | 5× 10 <sup>4</sup> particles in                                             | 30 µL  | Local Injection                                  | At day 0           | 1, 2, 8 weeks |
|                             |      | (3) BM-MSC-EV treated TSCs with fibrin sealant                | 30 µL<br>5×                                                                 | 30 µL  | Local Injection                                  | At day 0           | 1, 2, 8 weeks |
|                             |      | (4) EUG-BM-MSC-EV treated TSCs with fibrin sealant            | 10 <sup>4</sup> particles in 30 µL<br>5× 10 <sup>4</sup> particles in 30 µL | 30 µL  | Local Injection                                  | At day 0           | 1, 2, 8 weeks |
| Li et.al <sup>13</sup>      | 2020 | (1) PBS                                                       | NA                                                                          | 50 µL  | Subcutaneous injection                           | At day 0           | 3 weeks       |
|                             |      | (2) Exosomes                                                  | 200 µg/50 µL                                                                | 50 µL  | Subcutaneous injection                           | At day 0           | 3 weeks       |
|                             |      | (3) HCPT-exosomes                                             | 200 µg/50 µL                                                                | 50 µL  | Subcutaneous injection<br>Subcutaneous injection | At day 0           | 3 weeks       |
| Liu et.al <sup>16</sup>     | 2021 | (1) Sham group                                                | NA                                                                          | NA     | NA                                               | NA                 | 1, 2, 4 weeks |
|                             |      | (2) GelMA                                                     | NA                                                                          | 30 µL  | Implantation                                     | At day 0           | 1, 2, 4 weeks |
|                             |      | (3) Exosomes with GelMA                                       | 200 µg/30 µL                                                                | 30 µL  | Implantation                                     | At day 0           | 1, 2, 4 weeks |

|                          |      |     |                                 |                                       |                     |                                    |           |               |
|--------------------------|------|-----|---------------------------------|---------------------------------------|---------------------|------------------------------------|-----------|---------------|
| Liu et.al <sup>17</sup>  | 2021 | (1) | No treatment                    | NA                                    | NA                  | NA                                 | NA        | 4 weeks       |
|                          |      | (2) | Sham group                      | NA                                    | NA                  | NA                                 | NA        | 4 weeks       |
|                          |      | (3) | Exosomes                        | NR                                    | NR                  | Local Injection                    | At week 2 | 4 weeks       |
|                          |      | (4) | Exosomes/MBA                    | NR                                    | NR                  | Transdermal delivery               | At week 2 | 4 weeks       |
| Shen et.al <sup>19</sup> | 2019 | (1) | Collagen sheet                  | NA                                    | 5 mm <sup>3</sup>   | Implantation                       | At day 0  | 7 days        |
|                          |      | (2) | Collagen sheet loaded with EVs  | 5~6× 10 <sup>9</sup> particles/sheet  | 5 mm <sup>3</sup>   | Implantation                       | At day 0  | 7 days        |
|                          |      | (3) | Collagen sheet loaded with IEVs | 5~6× 10 <sup>9</sup> particles/sheet  | 5 mm <sup>3</sup>   | Implantation                       | At day 0  | 7 days        |
| Shi et.al <sup>21</sup>  | 2020 | (1) | No treatment                    | NA                                    | NA                  | NA                                 | NA        | 4 weeks       |
|                          |      | (2) | Tisseel patch                   | NA                                    | NR                  | Implantation                       | At day 0  | 4 weeks       |
|                          |      | (3) | PEP with Tisseel patch          | 1× 10 <sup>12</sup> particles/ml      | NR                  | Implantation                       | At day 0  | 4 weeks       |
| Song et.al <sup>22</sup> | 2022 | (1) | Sham group                      | NA                                    | NA                  | NA                                 | NA        | 2, 4, 8 weeks |
|                          |      | (2) | PHA                             | NA                                    | 200μL               | Local Injection                    | At day 0  | 2, 4, 8 weeks |
|                          |      | (3) | Exosomes with PHA               | 2 × 10 <sup>10</sup> particles/200 μL | 200 μL              | Local Injection                    | At day 0  | 2, 4, 8 weeks |
| Tao et.al <sup>23</sup>  | 2021 | (1) | Sham group                      | NA                                    | NA                  | NA                                 | NA        | 4 weeks       |
|                          |      | (2) | Hydrogel                        | 1× 10 <sup>11</sup> particles/ml      | 0.1 cm <sup>3</sup> | Implantation                       | At day 0  | 4 weeks       |
|                          |      | (3) | Con-EVs with hydrogel           | 1× 10 <sup>11</sup> particles/ml      | 0.1 cm <sup>3</sup> | Implantation                       | At day 0  | 4 weeks       |
|                          |      | (4) | H19-sOE-EVs with hydrogel       | 1× 10 <sup>11</sup> particles/ml      | 0.1 cm <sup>3</sup> | Implantation                       | At day 0  | 4 weeks       |
|                          |      | (5) | hnRNP A2/B1-EVs with hydrogel   | 1× 10 <sup>11</sup> particles/ml      | 0.1 cm <sup>3</sup> | Implantation                       | At day 0  | 4 weeks       |
|                          |      | (6) | H19-OL-EVs with hydrogel        | 1× 10 <sup>11</sup> particles/ml      | 0.1 cm <sup>3</sup> | Implantation                       | At day 0  | 4 weeks       |
| Wang et.al <sup>26</sup> | 2022 | (1) | No treatment                    | NA                                    | NA                  | NA                                 | NA        | 6, 12 weeks   |
|                          |      | (2) | Fibrin                          | NA                                    | NR                  | Local Injection                    | At day 0  | 6, 12 weeks   |
|                          |      | (3) | Exosomes with fibrin            | 1× 10 <sup>11</sup> particles/mL      | NR                  | Local Injection                    | At day 0  | 6, 12 weeks   |
|                          |      | (4) | Sham group                      | NA                                    | NA                  | NA                                 | NA        | 12 weeks      |
| Wang et.al <sup>27</sup> | 2021 | (1) | Saline                          | NA                                    | 10 μL               | Injection around the enthesis site | At week 6 | 10 weeks      |
|                          |      | (2) | Exosomes with saline            | 1× 10 <sup>11</sup> particles in      | 10 μL               | Injection around the enthesis site | At week 6 | 10 weeks      |
|                          |      | (3) | Saline                          | 10 μL NA                              | 10 μL               | Injection around the enthesis site | At week 6 | 10 weeks      |

|                               |      |     |                                      |                                               |                            |                          |              |                       |
|-------------------------------|------|-----|--------------------------------------|-----------------------------------------------|----------------------------|--------------------------|--------------|-----------------------|
| Wang et.al. <sup>24</sup>     | 2019 | (1) | Sham group                           | NA                                            | NA                         | NA                       | NA           | 8, 16 weeks           |
|                               |      | (2) | Saline                               | NA                                            | 20 $\mu$ L                 | Local Injection          | At day 0     | 8, 16 weeks           |
|                               |      | (3) | Exosomes with saline                 | $1 \times 10^{11}$ particles/20 $\mu$ L       | 20 $\mu$ L                 | Local Injection          | At day 0     | 8, 16 weeks           |
| Wang et.al. <sup>25</sup>     | 2019 | (1) | No treatment                         | NA                                            | NA                         | NA                       | NA           | 5 weeks               |
|                               |      | (2) | Rat TSCs                             | $1 \times 10^6$ particles in                  | 20 $\mu$ L                 | Local Injection          | Twice a week | 5 weeks               |
|                               |      | (3) | Exosomes from rat TSCs               | 20 $\mu$ L<br>0.486 $\mu$ g/ $\mu$ L          | 20 $\mu$ L                 | Local Injection          | Twice a week | 5 weeks               |
| Wellings et.al. <sup>30</sup> | 2021 | (1) | Sham group                           | NA                                            | NA                         | NA                       | NA           | 3, 6 weeks            |
|                               |      | (2) | Type 1 collagen scaffold             | NA                                            | NR                         | Apply at the repair site | At day 0     | 3, 6 weeks            |
|                               |      | (3) | PEP with type 1 collagen scaffold    | $1 \times 10^{11}$ particles/ml               | NR                         | Apply at the repair site | At day 0     | 3, 6 weeks            |
| Xu et.al. <sup>33</sup>       | 2022 | (1) | Saline                               | NA<br>$1 \times 10^{10}$ particles in         | 25 $\mu$ L                 | Local Injection          | At week 1    | 3, 5 weeks            |
|                               |      | (2) | Exosomes                             | 25 $\mu$ L                                    | 25 $\mu$ L                 | Local Injection          | At week 1    | 3, 5 weeks            |
|                               |      | (3) | Ectosomes                            | $1 \times 10^{10}$ particles in<br>25 $\mu$ L | 25 $\mu$ L                 | Local Injection          | At week 1    | 3, 5 weeks            |
| Xu et.al. <sup>34</sup>       | 2023 | (1) | Intact, no treatment                 | NA                                            | NA                         | NA                       | NA           | 3 days, 1, 2, 4 weeks |
|                               |      | (2) | Surgery, no treatment                | NA                                            | NA                         | NA                       | NA           | 3 days, 1, 2, 4 weeks |
|                               |      | (3) | GelMA hydrogel                       | NA                                            | 20 $\mu$ L                 | Implantation             | At day 0     | 3 days, 1, 2, 4 weeks |
|                               |      | (4) | EV <sub>B</sub> with GelMA hydrogel  | 80 $\mu$ g/20 $\mu$ L                         | 20 $\mu$ L                 | Implantation             | At day 0     | 3 days, 1, 2, 4 weeks |
|                               |      | (5) | EV <sub>N</sub> with GelMA hydrogel  | 80 $\mu$ g/20 $\mu$ L                         | 20 $\mu$ L                 | Implantation             | At day 0     | 3 days, 1, 2, 4 weeks |
| Yao et.al. <sup>36</sup>      | 2020 | (1) | Sham group                           | NA                                            | NA                         | NA                       | NA           | 3 weeks               |
|                               |      | (2) | Exosomes with PBS                    | 200 $\mu$ g/50 $\mu$ L                        | 50 $\mu$ L                 | Subcutaneous injection   | At day 0     | 3 weeks               |
|                               |      | (3) | PBS                                  | NA                                            | 50 $\mu$ L                 | Subcutaneous injection   | At day 0     | 3 weeks               |
| Yao et.al. <sup>37</sup>      | 2021 | (1) | Sham group                           | NA                                            | NA                         | NA                       | NA           | 2, 4 weeks            |
|                               |      | (2) | Fibrin glue                          | NA                                            | 50 $\mu$ L                 | Implantation             | At day 0     | 2, 4 weeks            |
|                               |      | (3) | Fibrin glue with HU-MSC exosomes     | 100 $\mu$ g/50 $\mu$ L                        | 50 $\mu$ L                 | Implantation             | At day 0     | 2, 4 weeks            |
|                               |      | (4) | Sham group                           | NA                                            | NA                         | NA                       | NA           | 4 weeks               |
|                               |      | (5) | Fibrin glue with agomir-NC exosomes  | 100 $\mu$ g/50 $\mu$ L                        | 50 $\mu$ L,<br>100 $\mu$ g | Implantation             | At day 0     | 4 weeks               |
|                               |      | (6) | Fibrin glue with agomir-29a exosomes | 100 $\mu$ g/50 $\mu$ L                        | 50 $\mu$ L,<br>100 $\mu$ g | Implantation             | At day 0     | 4 weeks               |

|                            |      |                                                        |                                             |                              |                                |            |                       |
|----------------------------|------|--------------------------------------------------------|---------------------------------------------|------------------------------|--------------------------------|------------|-----------------------|
| Ye et.al. <sup>38</sup>    | 2023 | (1) Sham group                                         | NA                                          | NA                           | NA                             | NA         | 2, 4 weeks            |
|                            |      | (2) PBS                                                | NA                                          | 100 $\mu$ L                  | Local injection                | At day 0   | 2, 4 weeks            |
|                            |      | (3) Small EVs                                          | $1 \times 10^{10}$ particles/ml             | 100 $\mu$ L                  | Local injection                | At day 0   | 2, 4 weeks            |
|                            |      | (4) Large EVs                                          | $1 \times 10^9$ particles/ml                | 100 $\mu$ L                  | Local injection                | At day 0   | 2, 4 weeks            |
| Yu et.al. <sup>39</sup>    | 2021 | (1) No treatment                                       | NA                                          | NA                           | NA                             | NA         | 2, 3 weeks            |
|                            |      | (2) Sham group                                         | NA                                          | NA                           | NA                             | NA         | 2, 3 weeks            |
|                            |      | (3) M2 macrophage exosomes                             | NR                                          | NR                           | NR                             | At day 0   | 2, 3 weeks            |
|                            |      | (4) CircRNA-Ep-400 depletion of M2 macrophage exosomes | NR                                          | NR                           | NR                             | At day 0   | 2, 3 weeks            |
| Yu et.al. <sup>40</sup>    | 2020 | (1) Exosomes with fibrin                               | 2 $\mu$ g/ $\mu$ L                          | 10 $\mu$ L                   | Local Injection                | At day 0   | 3 days, 1, 2, 4 weeks |
|                            |      | (2) PBS with fibrin                                    | NA                                          | 10 $\mu$ L                   | Local Injection                | At day 0   | 3 days, 1, 2, 4 weeks |
| Zhang et.al. <sup>41</sup> | 2022 | (1) Sham group                                         | NA                                          | NA                           | NA                             | NA         | 16, 20, 24 weeks      |
|                            |      | (2) Fiber-aligned patch                                | NA                                          | 1 $cm^2$ (size of the patch) | Fix the patch on supraspinatus | At week 12 | 16, 20, 24 weeks      |
|                            |      | (3) Exosomes-loaded fiber-aligned patch                | NR                                          | 1 $cm^2$ (size of the patch) | Fix the patch on supraspinatus | At week 12 | 16, 20, 24 weeks      |
| Zhang et.al. <sup>42</sup> | 2022 | (1) Saline                                             | 0.1 mg/kg                                   | NR                           | Local Injection                | At week 6  | 7 weeks               |
|                            |      | (2) Dexamethasone                                      | 0.1 mg/kg                                   | NR                           | Local Injection                | At week 6  | 7 weeks               |
|                            |      | (3) Exosomes with dexamethasone                        | $1 \times 10^{11}$ Particles/mL             | NR                           | Local Injection                | At week 6  | 7 weeks               |
| Zhang et.al. <sup>43</sup> | 2020 | (1) GelMA with Exosomes from TSCs                      | 200 $\mu$ g/30 $\mu$ L                      | 30 $\mu$ L                   | Local Injection                | At day 0   | 1, 2, 8 weeks         |
|                            |      | (2) GelMA group                                        | NA                                          | 30 $\mu$ L                   | Local Injection                | At day 0   | 1, 2, 8 weeks         |
|                            |      | (3) No treatment                                       | NA                                          | NA                           | NA                             | NA         | 1, 2, 8 weeks         |
| Zhao et.al. <sup>45</sup>  | 2022 | (1) Saline                                             | NA                                          | NR                           | Local Injection                | At week 1  | 5 weeks               |
|                            |      | (2) ASC with saline                                    | $1 \times 10^6$ particles                   | NR                           | Local Injection                | At week 1  | 5 weeks               |
|                            |      | (3) Exosomes with saline                               | 50 $\mu$ g                                  | NR                           | Local Injection                | At week 1  | 5 weeks               |
| Zhu et.al. <sup>46</sup>   | 2022 | (1) Sham tendinopathy group                            | NA                                          | NA                           | NA                             | NA         | 8 weeks               |
|                            |      | (2) PBS group                                          | NA                                          | 100 $\mu$ L                  | Local Injection                | weekly     | 8 weeks               |
|                            |      | (3) PBS with Exosomes from IP-MSC                      | $1 \times 10^{10}$ particles in 100 $\mu$ L | 100 $\mu$ L                  | Local Injection                | Weekly     | 8 weeks               |
|                            |      | (4)                                                    | $\mu$ L                                     |                              |                                |            |                       |
|                            |      | (5) Steroid-treated group                              | NA                                          | 100 $\mu$ L                  | Local Injection                | weekly     | 8 weeks               |

PBS, phosphate-buffered saline; IP-MSC, induced pluripotent mesenchymal stem cells; NA, not available; P5 EVs, extracellular vesicles from

mesenchymal stem cell at passage 5; P12 EVs, extracellular vesicles from mesenchymal stem cell at passage 12; GelMA, gelatin methacryloyl; TSCs, tendon stem cells; EVs, Extracellular vesicles; IEVs, IFN  $\gamma$ -primed Extracellular vesicles; Con-EVs, control extracellular vesicles; H19-sOE-EVs, extracellular vesicles derived from tendon stem/progenitor cells over-expressing H19; hnRNP A2/B1-EVs, extracellular vesicles derived from tendon stem/progenitor cells over-expressing hnRNP A2/B1; H19-OL-EVs, extracellular vesicles derived from tendon stem/progenitor cells co-overexpressed of H19 and hnRNP A2/B1; NR, not reported; PEP, purified exosome product; Exosomes/MBA, exosomes modified by a nitric oxide nanomotor; UCP1++ cells, Fibroadipogenic progenitors exhibiting a high UCP1 fluorescent intensity  $> 10^4$ , UCP1- cells, Fibroadipogenic progenitors that were UCP1-negative were defined as TdTomato fluorescent intensity  $< 10^2$ ; HU-MSC, Human umbilical cord mesenchymal stem cell; BMDM, bone marrow-derived macrophages; BM-MSCs, bone marrow mesenchymal stem cells; EV<sub>L</sub>, low concentration of Extracellular vesicles; EV<sub>H</sub>, high concentration of Extracellular vesicles; HCPT-exosomes, exosomes derived from human umbilical cord mesenchymal stem cell treated with hydroxycamptothecin; MSC, mesenchymal stem cells; MQ, macrophage; EEM, exosome-educated macrophages; PHA, photopolymerizable hyaluronic acid; BM-MSC-EV, bone marrow mesenchymal stem cells extracellular vesicle; EUG-BM-MSC-EV, eugenol treated bone marrow mesenchymal stem cells extracellular vesicle; EV<sub>B</sub>, bioactive glasses-elicited mesenchymal stem cell extracellular vesicle; EV<sub>N</sub>, native mesenchymal stem cell extracellular vesicle; ASC, Adipose stem cell

**Table S7:** Summary of animal studies and treatment parameters (Tendon-bone healing)

| Author                    | Year | Group/treatment                               | Concentration                   | Volume            | Delivery route                        | Frequency              | Euthanasia     |
|---------------------------|------|-----------------------------------------------|---------------------------------|-------------------|---------------------------------------|------------------------|----------------|
| Han et.al <sup>9</sup>    | 2022 | (1) Sham group                                | NA                              | NA                | NA                                    | NA                     | 12 weeks       |
|                           |      | (2) Exosomes                                  | NR                              | NR                | Injection into the key bone interface | At day 0               | 12 weeks       |
|                           |      | (3) Exosomes with empty microcapsules         | NR                              | NR                | Injection into the key bone interface | At day 0               | 12 weeks       |
|                           |      | (4) Exosomes with BMP-2-loaded microcapsules  | NR                              | NR                | Injection into the key bone interface | At day 0               | 12 weeks       |
| Huang et.al <sup>11</sup> | 2020 | (1) PBS                                       | NA                              | 200 $\mu$ L       | Injection into the tail vein          | At week 4              | 8, 12 weeks    |
|                           |      | (2) Exosomes with PBS                         | 200 $\mu$ g/200 $\mu$ L         | 200 $\mu$ L       | Injection into the tail vein          | At week 4              | 8, 12 weeks    |
| Li et.al <sup>15</sup>    | 2022 | (1) PBS                                       | NA                              | 50 $\mu$ L        | Injection into the joint cavity       | At day 0, day 3, day 7 | 4, 8 weeks     |
|                           |      | (2) BM-MSC Exosomes                           | $1 \times 10^{11}$ Particles/mL | 50 $\mu$ L        | Injection into the joint cavity       | At day 0, day 3, day 7 | 4, 8 weeks     |
|                           |      | (3) miR-23a-3p overexpression BM-MSC exosomes | $1 \times 10^{11}$ Particles/mL | 50 $\mu$ L        | Injection into the joint cavity       | At day 0, day 3, day 7 | 4, 8 weeks     |
| Ren et.al <sup>18</sup>   | 2021 | (1) No treatment                              | NA                              | NA                | NA                                    | NA                     | 6 weeks        |
|                           |      | (2) Fibrin sealant                            | NA                              | 27mm <sup>3</sup> | Implantation                          | At day 0               | 6 weeks        |
|                           |      | (3) Exosomes with fibrin sealant              | 20% (vol/vol)                   | 27mm <sup>3</sup> | Implantation                          | At day 0               | 6 weeks        |
| Shi et.al <sup>20</sup>   | 2020 | (1) Control group                             | NA                              | NR                | Local Injection                       | At day 0               | 7, 14, 30 days |
|                           |      | (2) Hydrogel                                  | NR                              | NR                | Local Injection                       | At day 0               | 7, 14, 30 days |
|                           |      | (3) Exosomes with hydrogel                    | NR                              | NR                | Local Injection                       | At day 0               | 7, 14, 30 days |

|                          |      |     |                                  |                                        |                                              |                                                                             |                                                                                            |               |
|--------------------------|------|-----|----------------------------------|----------------------------------------|----------------------------------------------|-----------------------------------------------------------------------------|--------------------------------------------------------------------------------------------|---------------|
| Wang et.al <sup>28</sup> | 2021 | (1) | Control group                    | NA                                     | NR                                           | Injected into bone tunnels                                                  | At day 0                                                                                   | NR            |
|                          |      | (2) | BM-MSC exosomes                  | 1× 10 <sup>10</sup><br>Particles/leg   | NR                                           | Injected into bone tunnels                                                  | At day 0                                                                                   | NR            |
|                          |      | (3) | BM – MSC <sup>AD</sup> exosomes  | 1× 10 <sup>10</sup><br>Particles/leg   | NR                                           | Injected into bone tunnels                                                  | At day 0                                                                                   | NR            |
|                          |      | (4) | BM – MSC <sup>SCX</sup> exosomes | 1× 10 <sup>10</sup><br>Particles/leg   | NR                                           | Injected into bone tunnels                                                  | At day 0                                                                                   | NR            |
|                          |      |     |                                  |                                        |                                              | Injected into bone tunnels                                                  |                                                                                            |               |
| Wang et.al <sup>29</sup> | 2020 | (1) | Sham group 1                     | NA                                     | NA                                           | NA                                                                          | NA                                                                                         | 6 weeks       |
|                          |      | (2) | Sham group 2                     | NA                                     | NA                                           | NA                                                                          | NA                                                                                         | 18 weeks      |
|                          |      | (3) | No treatment                     | NA                                     | NA                                           | NA                                                                          | NA                                                                                         | 6 weeks       |
|                          |      | (4) | Saline                           | NA                                     | 20μL/per side                                | Local Injection                                                             | At week 6                                                                                  | 18 weeks      |
|                          |      | (5) | Exosomes with saline             | 1× 10 <sup>11</sup><br>Particles/20 μL | 20μL/per side                                | Local Injection                                                             | At week 6                                                                                  | 18 weeks      |
| Wu et.al <sup>31</sup>   | 2022 | (1) | PBS                              | NA                                     | NR                                           | Local injection                                                             | At day 0                                                                                   | 2, 4, 8 weeks |
|                          |      | (2) | Exosomes                         | 100μg/tunnel                           | NR                                           | Local injection                                                             | At day 0                                                                                   | 2, 4, 8 weeks |
|                          |      | (3) | IONP-exosomes                    | 100μg/tunnel                           | NR                                           | Local injection                                                             | At day 0                                                                                   | 2, 4, 8 weeks |
| Wu et.al <sup>32</sup>   | 2021 | (1) | Saline                           | NA                                     | 20 μL                                        | Local Injection                                                             | At day 0                                                                                   | 2, 4 weeks    |
|                          |      | (2) | BM-MSC exosomes                  | 1× 10 <sup>11</sup><br>Particles/20μL  | 20 μL                                        | Local Injection                                                             | At day 0                                                                                   | 2, 4 weeks    |
|                          |      | (3) | LIPUS-BM-MSC exosomes            | 1× 10 <sup>11</sup><br>Particles/20μL  | 20 μL                                        | Local Injection                                                             | At day 0                                                                                   | 2, 4 weeks    |
| Xu et.al <sup>35</sup>   | 2022 | (1) | No treatment                     | NA                                     | NA                                           | NA                                                                          | NA                                                                                         | 2, 4, 8 weeks |
|                          |      | (2) | PBS and SAH                      | NA                                     | Intra-tunnel: 0.1 mL;Intra-articular: 0.2 mL | Intra-tunnel injection (SAH) and intra-articular injection (PBS)            | Intra-tunnel injection: at day 0<br>intra-articular injection:                             | 2, 4, 8 weeks |
|                          |      | (3) | IME and IME-loaded SAH           | 1× 10 <sup>10</sup><br>Particles/mL    | Intra-tunnel: 0.1 mL;Intra-articular: 0.2 mL | Intra-tunnel injection (IME-loaded SAH) and intra-articular injection (IME) | injection: weekly<br>Intra-tunnel injection: at day 0<br>intra-articular injection: weekly | 2, 4, 8 weeks |

|                           |     |                                        |          |        |                                                                |          |               |
|---------------------------|-----|----------------------------------------|----------|--------|----------------------------------------------------------------|----------|---------------|
| Zhang et.al <sup>44</sup> | (1) | PBS                                    | NA       | 300 μL | Injection into bone tunnels at 12, 4, and 8 o'clock directions | At day 0 | 2, 4, 8 weeks |
| 2022                      | (2) | Normal exosomes with adhesive hydrogel | 10 mg/mL | 300 μL | Injection into bone tunnels at 12, 4, and 8 o'clock directions | At day 0 | 2, 4, 8 weeks |
|                           | (3) | Hypo-exosomes with adhesive hydrogel   | 10 mg/mL | 300 μL | Injection into bone tunnels at 12, 4, and 8 o'clock directions | At day 0 | 2, 4, 8 weeks |

PBS, phosphate-buffered saline; NA, not available; NR, not reported; BM-MSC, bone marrow mesenchymal stem cell; BM – MSC<sup>SCX</sup>, Scleraxis-overexpressing bone marrow mesenchymal stem cell; BM – MSC<sup>AD</sup>, bone marrow mesenchymal stem cell transfected with empty vectors; SAH, sodium alginate hydrogel; IME, infrapatellar fat pad mesenchymal stem cell-derived exosome; Hypo-exosomes, exosomes secreted by hypoxia-stimulated bone-marrow mesenchymal stem cells; IONP-exosomes, Exosomes derived from magnetically actuated bone marrow mesenchymal stem cells; BMP, Bone morphogenetic protein; LIPUS-BM-MSC, Bone Marrow Mesenchymal Stem Cell Preconditioned by Low-Intensity Pulsed Ultrasound Stimulation;

## Reference

1. Chamberlain CS, Clements AEB, Kink JA, et al. Extracellular Vesicle-Educated Macrophages Promote Early Achilles Tendon Healing. Article. *Stem Cells*. 2019;37(5):652-662.
2. Chen SH, Chen ZY, Lin YH, et al. Extracellular vesicles of adipose-derived stem cells promote the healing of traumatized achilles tendons. Article. *International Journal of Molecular Sciences*. 2021;22(22)
3. Cui H, He Y, Chen S, Zhang D, Yu Y, Fan C. Macrophage-Derived miRNA-Containing Exosomes Induce Peritendinous Fibrosis after Tendon Injury through the miR-21-5p/Smad7 Pathway. Article. *Molecular Therapy - Nucleic Acids*. 2019;14:114-130.
4. Davies MR, Garcia S, Liu M, et al. Muscle-Derived Beige Adipose Precursors Secrete Promyogenic Exosomes That Treat Rotator Cuff Muscle Degeneration in Mice and Are Identified in Humans by Single-Cell RNA Sequencing. Article. *The American journal of sports medicine*. 2022;50(8):2247-2257.
5. Fu G, Lu L, Pan Z, Fan A, Yin F. Adipose-derived stem cell exosomes facilitate rotator cuff repair by mediating tendon-derived stem cells. Article. *Regenerative Medicine*. 2021;16(4):359-372.
6. Gao R, Ye T, Zhu Z, et al. Small extracellular vesicles from iPSC-derived mesenchymal stem cells ameliorate tendinopathy pain by inhibiting mast cell activation. Article. *Nanomedicine*. 2022;17(8):513-529.
7. Gissi C, Radeghieri A, Lamorgese Passeri CA, et al. Extracellular vesicles from rat-bone-marrow mesenchymal stromal/stem cells improve tendon repair in rat Achilles tendon injury model in dose-dependent manner: A pilot study. Article. *PLoS ONE*. 2020;15(3)
8. Han Q, Wang S, Chen D, Gan D, Wang T. Exosomes derived from human umbilical cord mesenchymal stem cells reduce tendon injuries via the miR-27b-3p/ARHGAP5/RhoA signaling pathway. Article. *Acta biochimica et biophysica Sinica*. 2022;54(2):1-11.
9. Han L, Liu H, Fu H, Hu Y, Fang W, Liu J. Exosome-delivered BMP-2 and polyaspartic acid promotes tendon bone healing in rotator cuff tear via Smad/RUNX2 signaling pathway. Article. *Bioengineered*. 2022;13(1):1459-1475.
10. Hayashi Y, Yimidi D, Sanada Y, et al. The therapeutic capacity of bone marrow MSC-derived extracellular vesicles in Achilles tendon healing is passage-dependent and indicated by specific glycans. Article. *FEBS Letters*. 2022;596(8):1047-1058.
11. Huang Y, He B, Wang L, et al. Bone marrow mesenchymal stem cell-derived exosomes promote rotator cuff tendon-bone healing by promoting angiogenesis and regulating M1 macrophages in rats. Article. *Stem Cell Research and Therapy*. 2020;11(1)
12. Jenner F, Wagner A, Gerner I, et al. Evaluation of the Potential of Umbilical Cord Mesenchymal Stromal Cell-

Derived Small Extracellular Vesicles to Improve Rotator Cuff Healing: A Pilot Ovine Study. *The American journal of sports medicine*. 2023;3635465221145958-3635465221145958.

13. Li J, Yao Z, Xiong H, et al. Extracellular vesicles from hydroxycamptothecin primed umbilical cord stem cells enhance anti-adhesion potential for treatment of tendon injury. Article. *Stem Cell Research and Therapy*. 2020;11(1)
14. Li X, Su Z, Shen K, et al. Eugenol-Preconditioned Mesenchymal Stem Cell-Derived Extracellular Vesicles Promote Antioxidant Capacity of Tendon Stem Cells in Vitro and in Vivo. Article. *Oxidative Medicine and Cellular Longevity*. 2022;2022
15. Li Z, Li Q, Tong K, et al. BMSC-derived exosomes promote tendon-bone healing after anterior cruciate ligament reconstruction by regulating M1/M2 macrophage polarization in rats. Article. *Stem Cell Research and Therapy*. 2022;13(1)
16. Liu H, Zhang M, Shi M, et al. Adipose-derived mesenchymal stromal cell-derived exosomes promote tendon healing by activating both SMAD1/5/9 and SMAD2/3. Article. *Stem Cell Research and Therapy*. 2021;12(1)
17. Liu A, Wang Q, Zhao Z, et al. Nitric Oxide Nanomotor Driving Exosomes-Loaded Microneedles for Achilles Tendinopathy Healing. Article. *ACS nano*. 2021;15(8):13339-13350.
18. Ren Y, Zhang S, Wang Y, et al. Effects of purified exosome product on rotator cuff tendon-bone healing in vitro and in vivo. Article. *Biomaterials*. 2021;276
19. Shen H, Yoneda S, Abu-Amer Y, Guilak F, Gelberman R. Stem cell-derived extracellular vesicles attenuate the early inflammatory response after tendon injury and repair. *J orthop res*. 2019;
20. Shi Y, Kang X, Wang Y, et al. Exosomes derived from bone marrow stromal cells (BMSCs) enhance tendon-bone healing by regulating macrophage polarization. Article. *Medical Science Monitor*. 2020;26
21. Shi G, Wang Y, Wang Z, et al. A novel engineered purified exosome product patch for tendon healing: An explant in an ex vivo model. Article in Press. *Journal of orthopaedic research : official publication of the Orthopaedic Research Society*. 2020;
22. Song K, Jiang T, Pan P, Yao Y, Jiang Q. Exosomes from tendon derived stem cells promote tendon repair through miR-144-3p-regulated tenocyte proliferation and migration. Article. *Stem Cell Research and Therapy*. 2022;13(1)
23. Tao SC, Huang JY, Li ZX, Zhan S, Guo SC. Small extracellular vesicles with LncRNA H19 “overload”: YAP Regulation as a Tendon Repair Therapeutic Tactic. Article. *iScience*. 2021;24(3):102200.
24. Wang C, Song W, Chen B, Liu X, He Y. Exosomes Isolated From Adipose-Derived Stem Cells: A New Cell-Free Approach to Prevent the Muscle Degeneration Associated With Torn Rotator Cuffs. Article. *The American journal of sports medicine*. 2019;47(13):3247-3255.
25. Wang Y, He G, Guo Y, et al. Exosomes from tendon stem cells promote injury tendon healing through balancing synthesis and degradation of the tendon extracellular matrix. Article. *Journal of Cellular and Molecular Medicine*. 2019;23(8):5475-5485.
26. Wang C, Tan J, Zhang Y, Chen D, He Y. In Situ-Forming Fibrin Gel Encapsulation of MSC-Exosomes for Partial-Thickness Rotator Cuff Tears in a Rabbit Model: Effectiveness Shown in Preventing Tear Progression and Promoting Healing. Article. *Journal of Bone and Joint Surgery*. 2022;104(16):1492-1502.
27. Wang C, Zhang Y, Zhang G, Yu W, He Y. Adipose Stem Cell-Derived Exosomes Ameliorate Chronic Rotator Cuff Tendinopathy by Regulating Macrophage Polarization: From a Mouse Model to a Study in Human Tissue. Article. *The American journal of sports medicine*. 2021;49(9):2321-2331.
28. Wang F, Qian J, Yang M-y, et al. MiR-6924-5p-rich exosomes derived from genetically modified Scleraxis-overexpressing PDGFR alpha(+) BMMSCs as novel nanotherapeutics for treating osteolysis during tendon-bone healing and improving healing strength. Article. *Biomaterials*. 2021;279121242.
29. Wang C, Hu Q, Song W, Yu W, He Y. Adipose Stem Cell-Derived Exosomes Decrease Fatty Infiltration and Enhance Rotator Cuff Healing in a Rabbit Model of Chronic Tears. Article. *The American journal of sports medicine*. 2020;48(6):1456-1464.
30. Wellings EP, Huang TCT, Li J, et al. Intrinsic Tendon Regeneration After Application of Purified Exosome Product: An In Vivo Study. Article. *Orthopaedic Journal of Sports Medicine*. 2021;9(12)
31. Wu XD, Kang L, Tian J, et al. Exosomes derived from magnetically actuated bone mesenchymal stem cells promote tendon-bone healing through the miR-21-5p/SMAD7 pathway. Article. *Materials Today Bio*. 2022;15100319.
32. Wu B, Chen H, Shi X, et al. Exosomes Derived from Bone Marrow Mesenchymal Stem Cell Preconditioned by Low-

Intensity Pulsed Ultrasound Stimulation Promote Bone-Tendon Interface Fibrocartilage Regeneration and Ameliorate Rotator Cuff Fatty Infiltration. *Medical Science Monitor*. 2021;

33. Xu T, Lin Y, Yu X, et al. Comparative Effects of Exosomes and Ectosomes Isolated From Adipose-Derived Mesenchymal Stem Cells on Achilles Tendinopathy in a Rat Model. Article. *The American journal of sports medicine*. 2022;50(10):2740-2752.

34. Xu H, Zhu Y, Hsiao AWT, et al. Bioactive glass-elicited stem cell-derived extracellular vesicles regulate M2 macrophage polarization and angiogenesis to improve tendon regeneration and functional recovery. Article. *Biomaterials*. 2023;294

35. Xu J, Ye Z, Han K, et al. Infrapatellar Fat Pad Mesenchymal Stromal Cell-Derived Exosomes Accelerate Tendon-Bone Healing and Intra-articular Graft Remodeling After Anterior Cruciate Ligament Reconstruction. Article. *The American journal of sports medicine*. 2022;50(3):662-673.

36. Yao Z, Li J, Wang X, et al. MicroRNA-21-3p engineered umbilical cord stem cell-derived exosomes inhibit tendon adhesion. Article. *Journal of Inflammation Research*. 2020;13:303-316.

37. Yao Z, Li J, Xiong H, et al. MicroRNA engineered umbilical cord stem cell-derived exosomes direct tendon regeneration by mTOR signaling. Article. *Journal of Nanobiotechnology*. 2021;19(1)

38. Ye T, Chen Z, Zhang J, et al. Large extracellular vesicles secreted by human iPSC-derived MSCs ameliorate tendinopathy via regulating macrophage heterogeneity. Article. *Bioactive Materials*. 2023;21:194-208.

39. Yu Y, Sun B, Wang Z, et al. Exosomes From M2 Macrophage Promote Peritendinous Fibrosis Posterior Tendon Injury via the MiR-15b-5p/FGF-1/7/9 Pathway by Delivery of circRNA-Ep400. Article. *Frontiers in Cell and Developmental Biology*. 2021;9

40. Yu H, Cheng J, Shi W, et al. Bone marrow mesenchymal stem cell-derived exosomes promote tendon regeneration by facilitating the proliferation and migration of endogenous tendon stem/progenitor cells. Article. *Acta Biomaterialia*. 2020;106:328-341.

41. Zhang X, Han Z, Han K, et al. Loading Mesenchymal Stem Cell-Derived Exosomes Into a Traditionally Designed Rotator Cuff Patch: A Potential Strategy to Enhance the Repair of Chronic Rotator Cuff Tear Associated With Degenerative Changes. Article. *The American journal of sports medicine*. 2022;50(8):2234-2246.

42. Zhang X, Li A, Han K, et al. Anti-inflammatory and Tendon-Protective Effects of Adipose Stem Cell-Derived Exosomes with Concomitant Use of Glucocorticoids. Article. *Stem Cells International*. 2022;2022

43. Zhang M, Liu H, Cui Q, et al. Tendon stem cell-derived exosomes regulate inflammation and promote the high-quality healing of injured tendon. Article. *Stem Cell Research and Therapy*. 2020;11(1)

44. Zhang T, Yan S, Song Y, et al. Exosomes secreted by hypoxia-stimulated bone-marrow mesenchymal stem cells promote grafted tendon-bone tunnel healing in rat anterior cruciate ligament reconstruction model. Article. *Journal of Orthopaedic Translation*. 2022;36:152-163.

45. Zhao H, Jiang H, Zhang H, et al. Adipose-Derived Mesenchymal Stem Cell-Derived Extracellular Vesicles Rescue Tendon Injury in Rat via the miR-19 a/IGFBP3 Axis. Article. *Stem Cells International*. 2022;2022

46. Zhu Z, Gao R, Ye T, et al. The Therapeutic Effect of iMSC-Derived Small Extracellular Vesicles on Tendinopathy Related Pain Through Alleviating Inflammation: An in vivo and in vitro Study. Article. *Journal of Inflammation Research*. 2022;15:1421-1436.
